# Supplementary material for: Simultaneous Monitoring of ppmv Level Methane and ppbv Level VOCs Near Industrial Sources Using a Real-Time GC
Source: Research Square preprint supplement (doi:10.21203/rs.3.rs-2520838/v1), 2023-02-08
Supplement: Supplementary file 1 [file 1ab76e47a6f921e4714d4f66.doc]

**Supporting information for**

Simultaneous Monitoring of ppmv Level Methane and ppbv Level VOCs Near Industrial Sources Using a Real-Time GC

**Rih-Sheng Jian1, Junn-An Chu1, Lung-Yu Song2, Ei-Wen Lo3, Chia-Jung Lu1***

*1Department of Chemistry, National Taiwan Normal University, Taipei, Taiwan*

*2Green Energy and Environment Research Laboratories, Industrial Technology Research Institute, Hsinchu, Taiwan*

*3Department of Occupational Safety and Health, China Medical University, Taichung, Taiwan*

***Full view of real-time GC-FID instrument***

**Fig. S1.** Full view of real-time GC-FID instrument shows additional parts.

***1 ppmv toluene loop injection test***

**Fig. S2.** Chromatographic signal of 1 ppmv toluene injected using 0.5 mL sampling loop (i.e., by-pass preconcentrator). The S/N ratio is estimated to be 30.4 which exceeds the limit of quantification (LOQ) is S/N = 10. This portable GC might be able to quantify the concentration of toluene slightly below 1 ppmv without preconcentration, but it is approaching its lower limit already.

***Additional VOCs found during field study***

These following VOCs were detected during field study. They only appeared occasionally in very low concentration. Therefore, they are not discussed in text.

**Fig. S3.** Real-time concentration results of hexane during field study.

**Fig. S4.** Real-time concentration results of ethylbenzene during field study.

**Fig. S5.** Real-time concentration results of styrene during field study.
